# Supplementary material
Source: MDPI journal article supplement (https://www.mdpi.com/2297-8739/10/9/465)
Supplement: s1 [file s1]

## Supplementary material

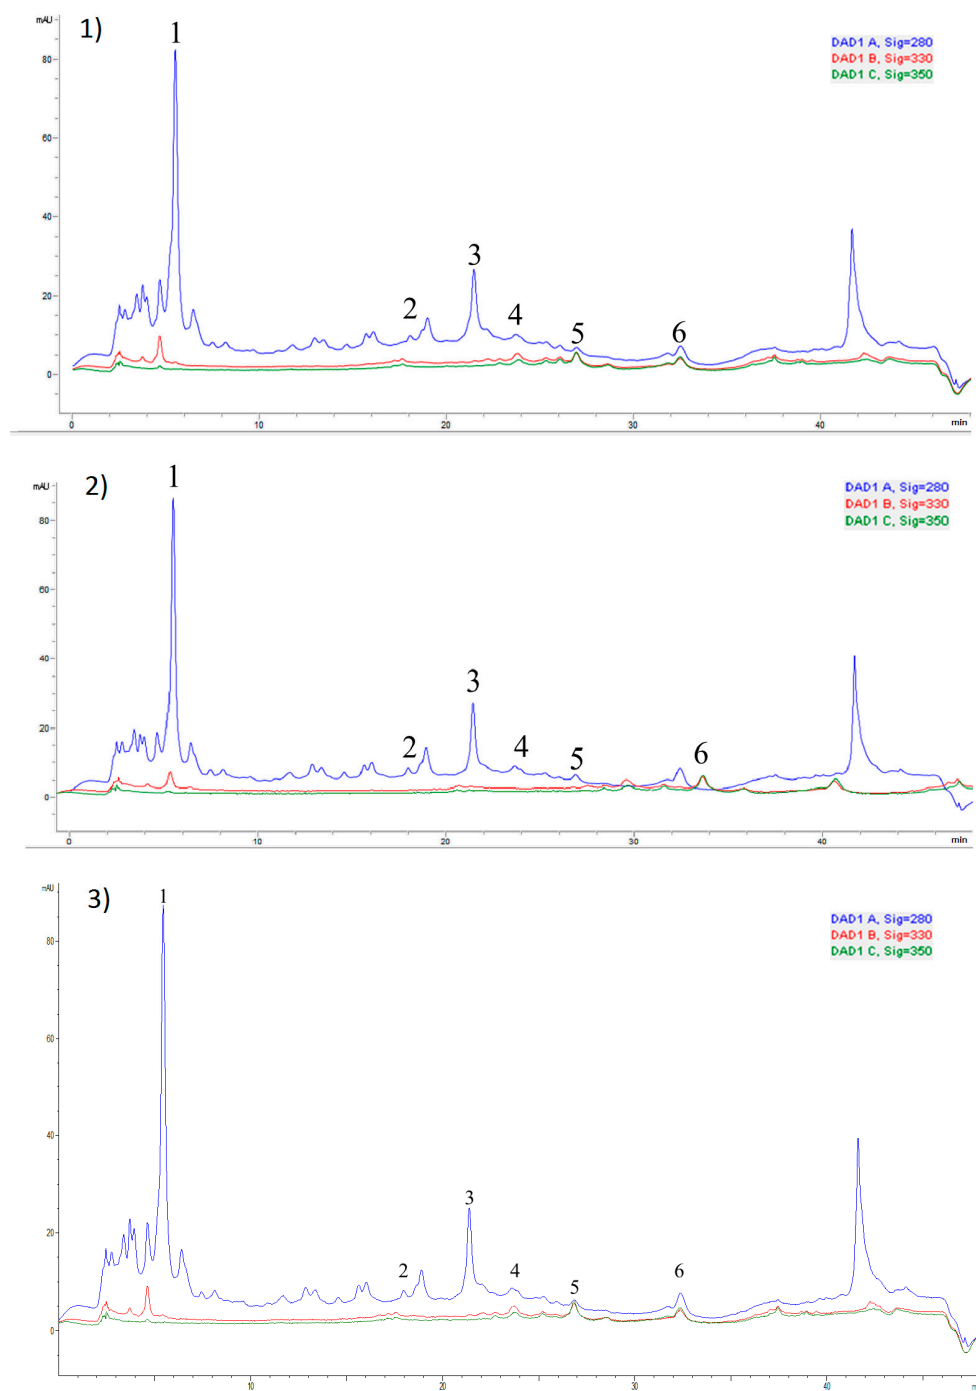

**Figure S1.** Chromatogram of carob flour extracts obtained by 1) MAE, 2) S/L and 3) UAE with detection at 280 nm, 330 nm and 350 nm: 1-Gallic acid, 2-Quercetin, 3-Caffeic acid, 4-Chlorogenic acid, 5-Rutin, 6-Quercitrin.

**Table S1.** Validation parameters for HPLC analysis

| Analyte                     | Equation           | $R^2$ | LOD ( $\mu\text{g/g}$ of dry extract) | LOQ ( $\mu\text{g/g}$ of dry extract) | U (%) |
|-----------------------------|--------------------|-------|---------------------------------------|---------------------------------------|-------|
| <i>trans</i> -cinnamic acid | $y=7.9398x+6.5653$ | 0.999 | 1.5                                   | 5.0                                   | 11    |
| caffeic acid                | $y=6.4807x+1.4903$ | 0.999 | 1.5                                   | 10.0                                  | 5     |
| <i>p</i> -coumaric acid     | $y=5.5894x+12.473$ | 0.999 | 1.5                                   | 10.0                                  | 10    |
| quercetin                   | $y=9.4489x+8.3990$ | 0.998 | 1.5                                   | 10.0                                  | 7     |
| chlorogenic acid            | $y=2.9003x+4.6876$ | 0.999 | 6.5                                   | 15.0                                  | 5     |
| rosmarinic acid             | $y=3.5125x+0.3322$ | 0.998 | 8.0                                   | 25.0                                  | 6     |
| ferulic acid                | $y=1.6072x-5.5118$ | 0.998 | 4.5                                   | 12.0                                  | 6     |
| gallic acid                 | $y=3.0497x+5.4494$ | 0.999 | 2.5                                   | 15.0                                  | 15    |
| rutin                       | $y=2.1224x+5.4787$ | 0.999 | 8.0                                   | 25.0                                  | 8     |
| quercitrin                  | $y=2.4017x-2.8372$ | 0.999 | 6.5                                   | 25.0                                  | 5     |

$R^2$  - coefficient of determination; LOD - limit of detection; LOQ - limit of quantification; U - expanded measurement uncertainty ( $k=2$ ).

**Table S2.** Phenolic profile of carob flour extracts obtained by different extraction techniques: 1) optimized microwave-assisted, 2) ultrasound-assisted and 3) solid-liquid extraction.

| Compound                    | MAE<br>( $\mu\text{g/g}$ dry extract) | S/L<br>( $\mu\text{g/g}$ dry extract) | UAE<br>( $\mu\text{g/g}$ dry extract) |
|-----------------------------|---------------------------------------|---------------------------------------|---------------------------------------|
| <i>trans</i> -cinnamic acid | <LOD                                  | <LOD                                  | <LOD                                  |
| caffeic acid                | $259.29 \pm 12.96$                    | $331.37 \pm 16.57$                    | $246.03 \pm 12.30$                    |
| <i>p</i> -coumaric acid     | <LOD                                  | <LOD                                  | <LOD                                  |
| quercetin                   | <LOQ                                  | <LOQ                                  | <LOQ                                  |
| chlorogenic acid            | $73.88 \pm 3.69$                      | $108.97 \pm 5.45$                     | $67.71 \pm 3.39$                      |
| rosmarinic acid             | <LOD                                  | <LOD                                  | <LOD                                  |
| ferulic acid                | <LOD                                  | <LOD                                  | <LOD                                  |
| gallic acid                 | $2371.86 \pm 355.78$                  | $2318.70 \pm 347.80$                  | $2525.08 \pm 378.76$                  |
| rutin                       | $94.91 \pm 7.59$                      | $171.11 \pm 13.69$                    | $98.27 \pm 7.86$                      |
| quercitrin                  | $74.93 \pm 3.75$                      | $118.73 \pm 5.94$                     | $77.23 \pm 3.86$                      |

MAE – microwave-assisted extraction; UAE – ultrasound-assisted extraction; S/L – solid-liquid extraction; LOD – limit of detection; LOQ – limit of quantification.
